# Supplementary material for: Preparation of a carboxymethyl β-cyclodextrin polymer and its rapid adsorption performance for basic fuchsin
Source: Royal Society of Chemistry journal article supplement (doi:10.1039/c9ra10797e), 2020-01-01
Supplement: c9ra10797e1.pdf [file c9ra10797e1.pdf]

## Supplementary Information

### **Preparation of carboxymethyl $\beta$ -cyclodextrin polymer and its rapid adsorption performance for basic fuchsin**

Hongyu Pu,<sup>a</sup> Peixiao Tang,<sup>\*a</sup> Ludan Zhao,<sup>a</sup> Qiaomei Sun,<sup>a</sup> Yuanming Zhai,<sup>b</sup>

Zhiqiang Li,<sup>c</sup> Na Gan,<sup>a</sup> Yuanyuan Liu,<sup>a</sup> Xiuyun Ren,<sup>a</sup> and Hui Li<sup>\*a</sup>

<sup>a</sup> *School of Chemical Engineering, Sichuan University, Chengdu 610065, PR China*

<sup>b</sup> *Analytical & Testing Center, Sichuan University, Chengdu 610064, PR China*

<sup>c</sup> *China Tobacco Yunnan Industrial co., LTD., Kunming 650231, PR*

---

\* Corresponding author. Tel.: +86 028 85405220; fax: +86 028 85401207.

E-mail address: lihuilab@sina.com (H. Li); tangpeixiao@126.com (P. Tang)

Table S1. Comparison of the adsorption equilibrium time of some new adsorbents for removal BF.

| Adsorbent                                                             | Water System                              | Adsorbent dose (g/L) | Equilibrium time (min) | $q_{max}$ (mg/g) | References |
|-----------------------------------------------------------------------|-------------------------------------------|----------------------|------------------------|------------------|------------|
| $\beta$ -CDP-COOH                                                     | triple-distilled water with pH value of 6 | 1                    | 1                      | 70               | This work  |
| bottom ash                                                            | water                                     | 4                    | 105                    | 7                | 1          |
| deoiled soya                                                          | water                                     | 2                    | 90                     | 13               | 1          |
| anionic polyacrylamide/graphene oxide aerogels                        | deionized water                           | 0.5                  | 4200                   | 1034             | 2          |
| cation-exchange resin                                                 | purified water                            | 1                    | 25                     | 114              | 3          |
| gangue microspheres                                                   | unmentioned                               | 20                   | 60                     | 24               | 4          |
| Al-MCM-41                                                             | unmentioned                               | 1                    | 90                     | 54               | 5          |
| activated carbon/ferrospinel composite                                | unmentioned                               | 2                    | 30                     | 101              | 6          |
| $\beta$ cyclodextrin–carboxymethyl cellulose–graphene oxide composite | unmentioned                               | 15                   | 150                    | 59               | 7          |
| $\beta$ -cyclodextrin-                                                | double-                                   | 1                    | 90                     | 64               | 8          |

|                              |           |     |    |    |   |
|------------------------------|-----------|-----|----|----|---|
| styrene-based                | distilled |     |    |    |   |
| polymer                      | water     |     |    |    |   |
| maleamic acid cross-         |           |     |    |    |   |
| linked $\beta$ -cyclodextrin | purified  | 3.3 | 80 | 28 | 9 |
| polymer                      | water     |     |    |    |   |

Table S2. Water regain analysis of  $\beta$ -CDP and  $\beta$ -CDP-COOH (data were determined from the average of three measurements).

| Polymers          | $W_d$ | $W_w$ | Water regain |
|-------------------|-------|-------|--------------|
| $\beta$ -CDP      | 3.68  | 6.50  | 76.66%       |
| $\beta$ -CDP-COOH | 3.85  | 8.15  | 111.69%      |

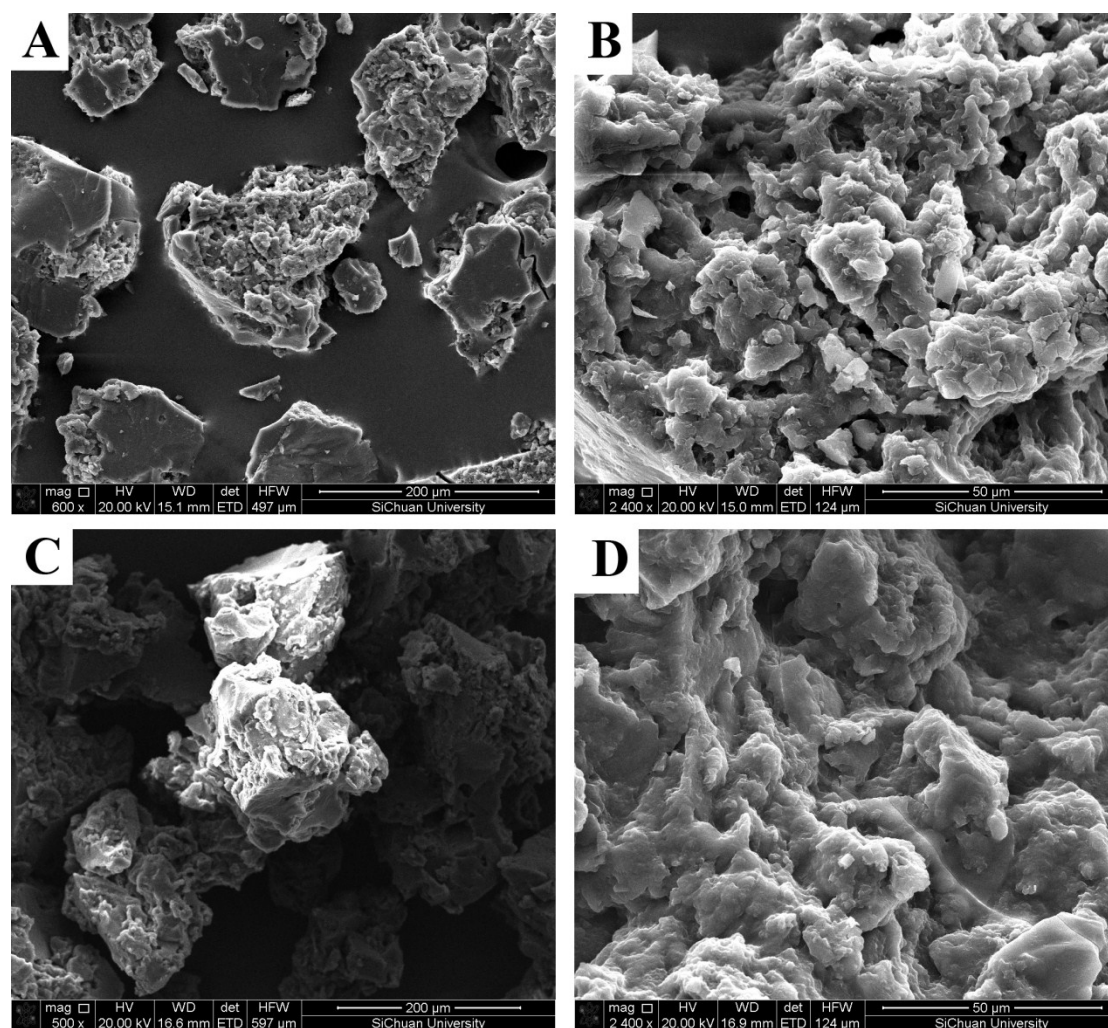

Fig. S1 SEM images of (A)  $\beta$ -CDP (600 $\times$ ), (B)  $\beta$ -CDP (2400 $\times$ ), (C)  $\beta$ -CDP-COOH

(500 $\times$ ) and (D)  $\beta$ -CDP-COOH (2400 $\times$ )

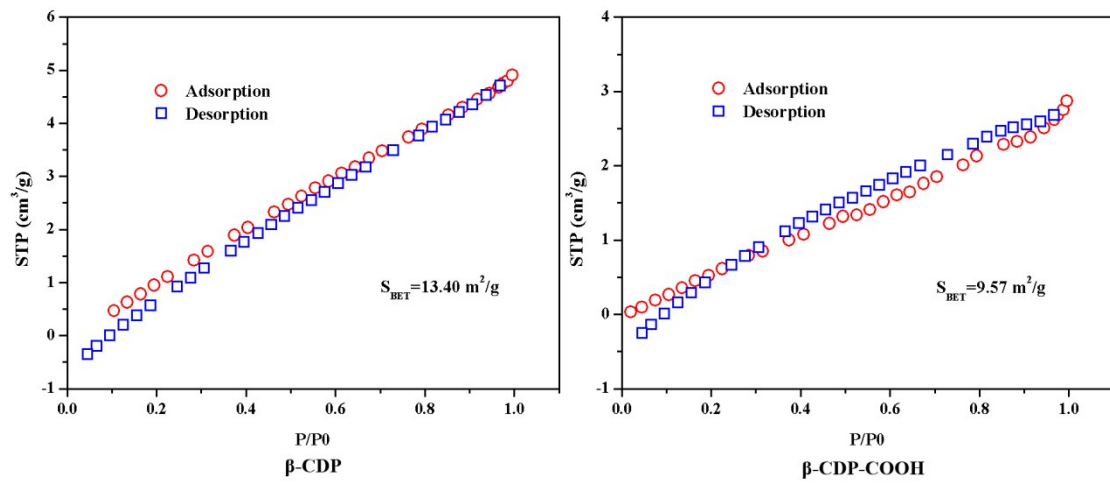

Fig. S2  $N_2$  adsorption-desorption isotherms and surface area data analysis of  $\beta$ -CDP and  $\beta$ -CDP-COOH.

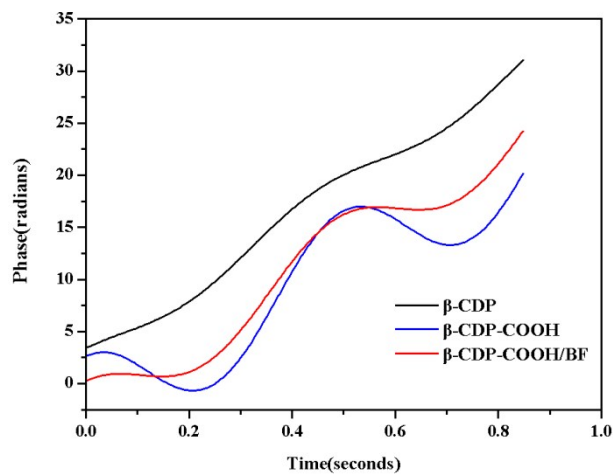

Fig. S3 Zeta potential of  $\beta$ -CDP,  $\beta$ -CDP-COOH before and after adsorption.

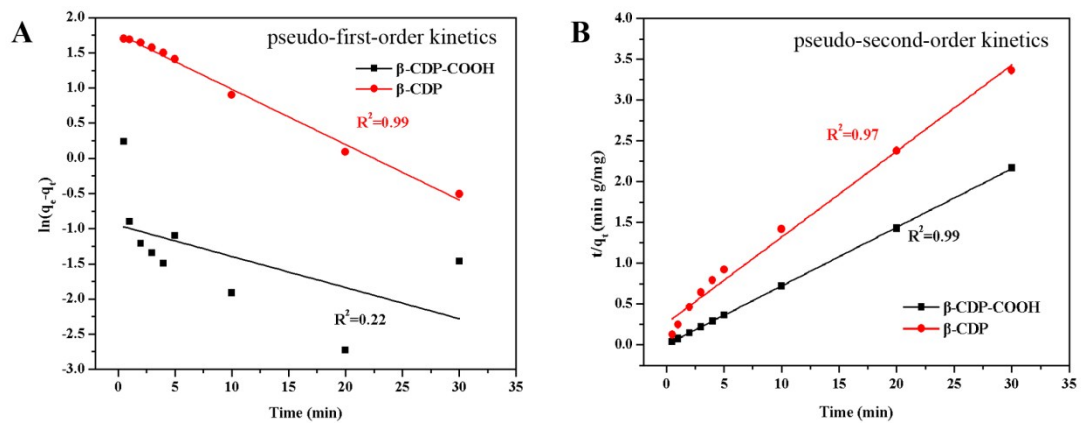

Fig. S4 Plots of (A) pseudo-first-order kinetics and (B) pseudo-second-order kinetics.

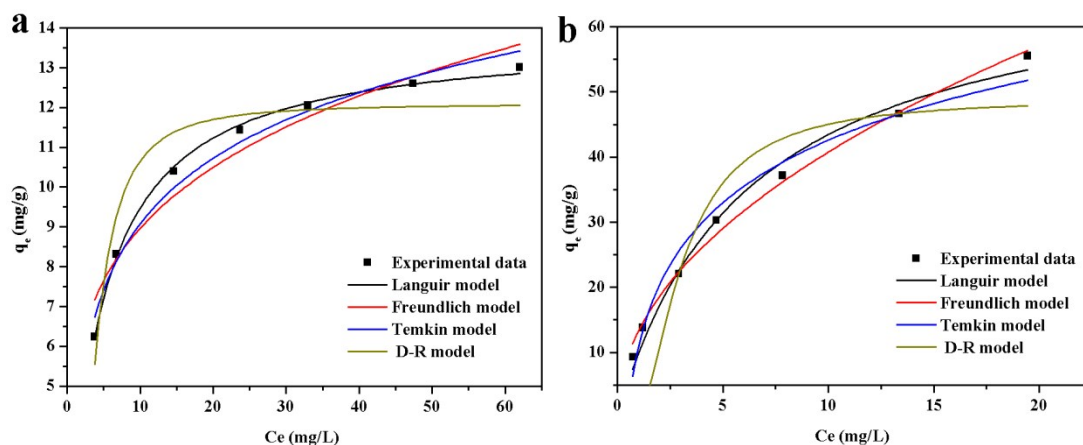

Fig. S5 Fitting curve of BF adsorption isotherms onto  $\beta$ -CDP (a) and  $\beta$ -CDP-COOH (b) of the Langmuir, Freundlich, Temkin, and Dubnin–Radushkevich (D-R) isotherm models.

## References

- 1 V. K. Gupta, A. Mittal, V. Gajbe and J. Mittal, *J. Colloid Interf. Sci.*, 2008, **319**, 30-39.
- 2 X. Yang, Y. Li, Q. Du, J. Sun, L. Chen, S. Hu, Z. Wang, Y. Xia and L. Xia, *J. Colloid Interf. Sci.*, 2015, **453**, 107-114.
- 3 G. Bayramoglu, B. Altintas and M. Y. Arica, *Chem. Eng. J.*, 2009, **152**, 339-346.
- 4 S. Yan, Y. Pan, L. Wang, J. Liu, Z. Zhang, W. Huo, J. Yang and Y. Huang, *J. Adv. Ceram.*, 2018, **7**, 30-40.
- 5 Y. Guan, S. Wang, X. Wang, C. Sun, Y. Wang and L. Hu, *Micropor. Mesopor. Mat.*, 2018, **265**, 266-274.
- 6 L. Ai and J. Jiang, *Desalination*, 2010, **262**, 134-140.
- 7 J. Yuan, F. Qiu and P. Li, *J. Iran. Chem. Soc.*, 2017, **14**, 1827-1837.
- 8 X. Li, L. Xie, X. Yang and X. Nie, *RSC Adv.*, 2018, **8**, 40321-40329.
- 9 X. Zhang, H. Li, M. Cao and C. Chen, *Adv. Mater. Res.*, 2014, **937**, 9-16.
